# Supplementary material
Source: publisher site journal article supplement (https://www.dovepress.com/article/266663)
Supplement: Supplementary file 1 [file get_supplementary_file.php]

**Supplementary Data**

|   ***Supplementary Figure 1.*** *Nyquist diagrams for MASMC, sEND1 and co-culture with LIDE and SIDE.* |
| --- |

|   ***Supplementary Figure 2.*** *Normalised impedance (Impedance with cells / Impedance without cells) for MASMC, sEND1 and co-culture with LIDE and SIDE.* |
| --- |

| ***Supplementary Figure 3****. Area under Curve and Student’s t-test results for Normalised impedance* |
| --- |

| 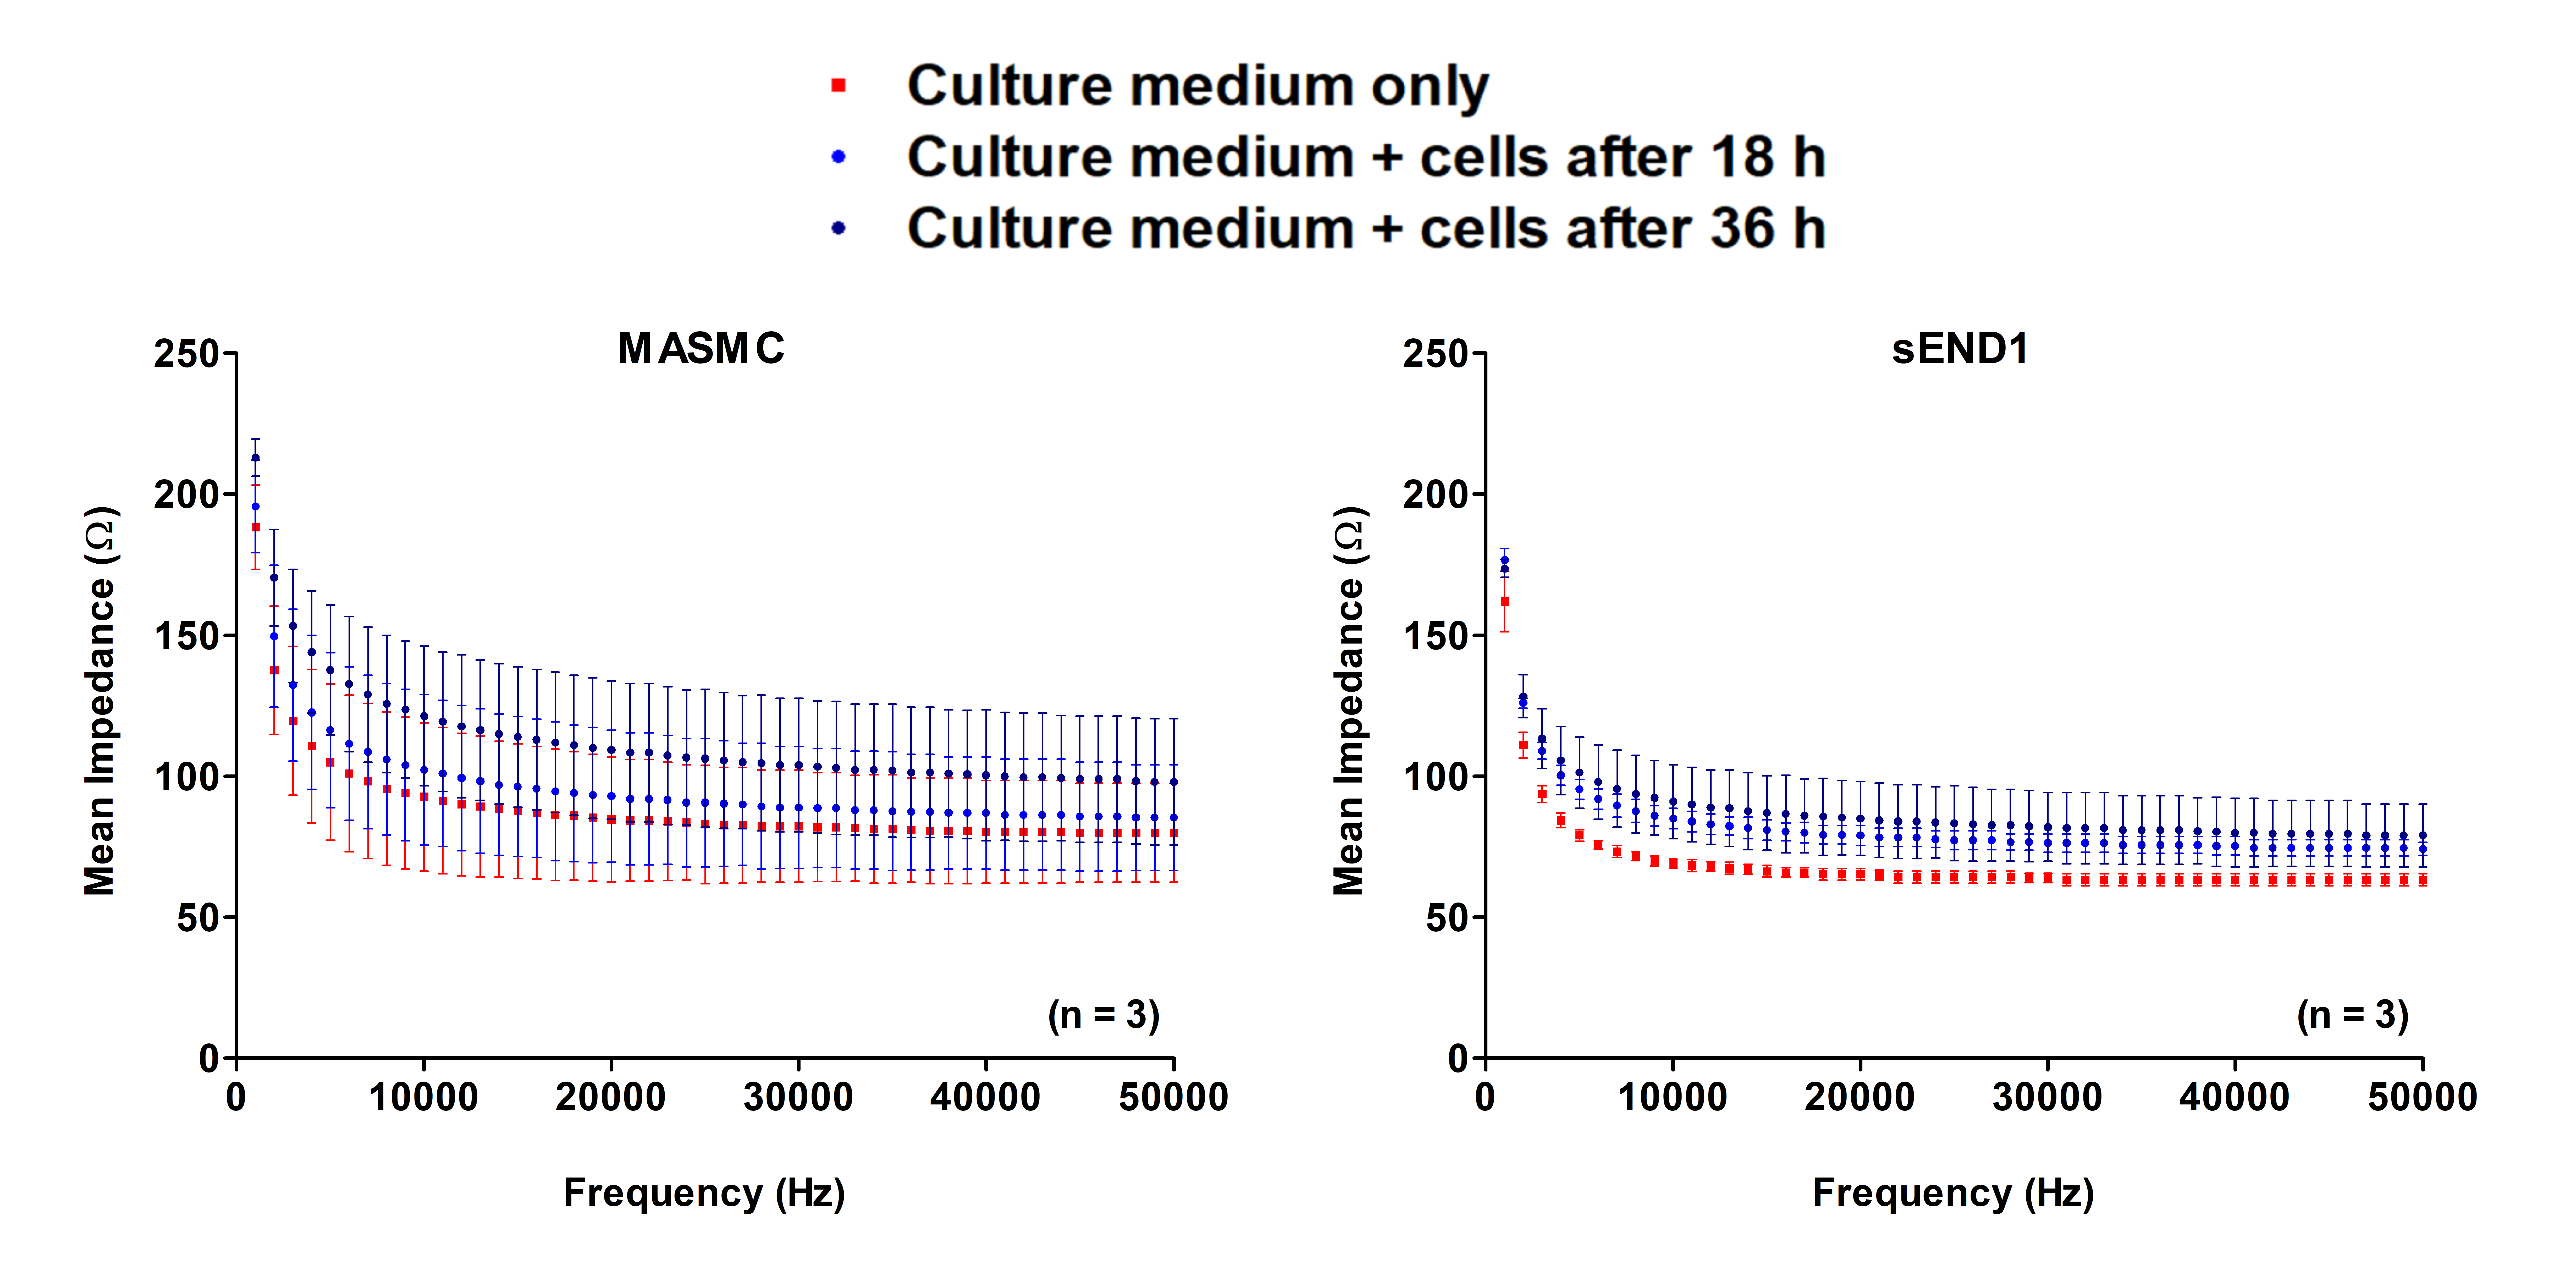  ***Supplementary Figure 4.*** *Short sweep (1 kHz to 50 kHz) Bode plots for MASMC and sEND1 at 1 day and 2 days post-seeding.* |
| --- |

|   ***Supplementary Figure 5.*** *Compiled Bode plots for MASMC, sEND1 and co-culture, acquired using LIDE* |
| --- |

|   ***Supplementary Figure 6.*** *Compiled Bode plots for MASMC, sEND1 and co-culture, acquired using SIDE* |
| --- |

|   ***Supplementary Figure 7.*** *Compiled* *MIPUA vs Mean Phase plots for MASMC, sEND1 and co-culture, acquired using LIDE* |
| --- |

|   ***Supplementary Figure 8.*** *Compiled MIPUA vs Mean Phase plots for MASMC, sEND1 and co-culture, acquired using SIDE* |
| --- |

**Havriliak-Negami Model curve fitting**

The following equation from Joshi *et al.* (**2017**) was used to derive the dielectric constant data from the impedance data in Figure 6 (for MASMC and sEND1 acquired using SIDE), where ε’ is the dielectric constant, t is the distance between the electrodes, ω is the angular frequency, ε0 is the permittivity of free space, Z’ is the real part of the impedance and Z’’ is the imaginary part of the impedance:

The experimental dielectric constant data acquired using the above equation was then fitted using the Havriliak-Negami model curve:

The curve fitting was carried out by rewriting the equation as follows, and building a fitting function in Origin 2020b Version 9.7.5.184:

| ***Supplementary Table. 1.*** *Havriliak-Negami Model curve fitting parameters* |
| --- |

| 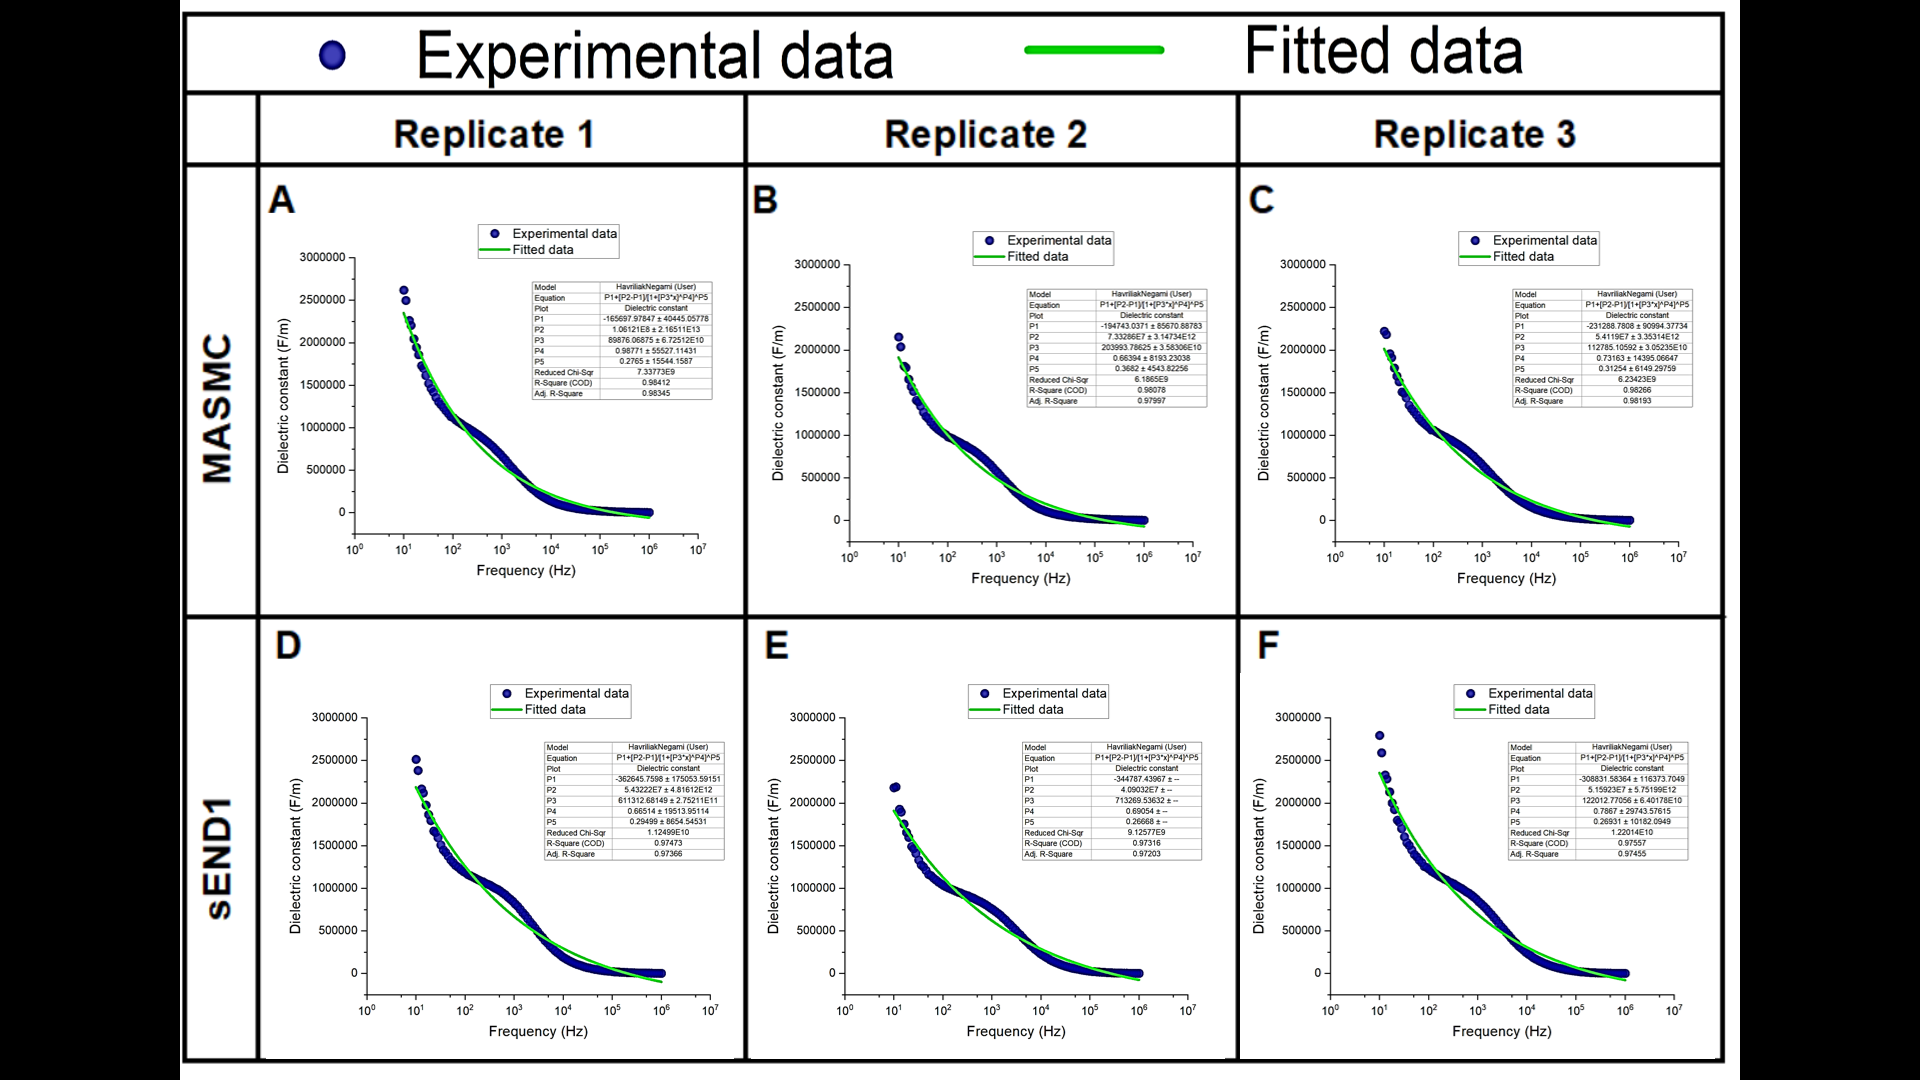  ***Supplementary Figure 9.*** *Experimental and fitted dielectric constant data for MASMC and sEND1 acquired using SIDE.* |
| --- |

The curve fitting is shown in Supplementary Figure 7. and the analysis of the fitting parameters is shown in Supplementary Table 1. The fitting parameters were compared using Student’s t-test. The r2 value was significantly different (p < 0.01), indicating that the Havriliak-Negami model curve was a better fit for the data with MASMC compared to sEND1. The parameter P1, which represents is significantly different (p < 0.01) between MASMC and sEND1, and could thus be a potential method of distinguishing between the 2 cell types.
